# Supplementary material
Source: PubMed Central journal article supplement (PMC10680783)
Supplement: NIHMS1945399-supplement-Supplementary_Material.pdf [file NIHMS1945399-supplement-Supplementary_Material.pdf]

Supplementary Materials for  
**Gut microbiome composition may be an indicator of preclinical  
Alzheimer's disease**

Aura L. Ferreiro *et al.*

Corresponding author: Beau M. Ances, [bances@wustl.edu](mailto:bances@wustl.edu); Gautam Dantas, [dantas@wustl.edu](mailto:dantas@wustl.edu)

*Sci. Transl. Med.* **15**, eabo2984 (2023)  
DOI: 10.1126/scitranslmed.abo2984

**The PDF file includes:**

Figs. S1 to S6  
Tables S1 to S9  
Legends for data files S1 to S4

**Other Supplementary Material for this manuscript includes the following:**

Data files S1 to S4  
MDAR reproducibility checklist

## Supplementary Materials

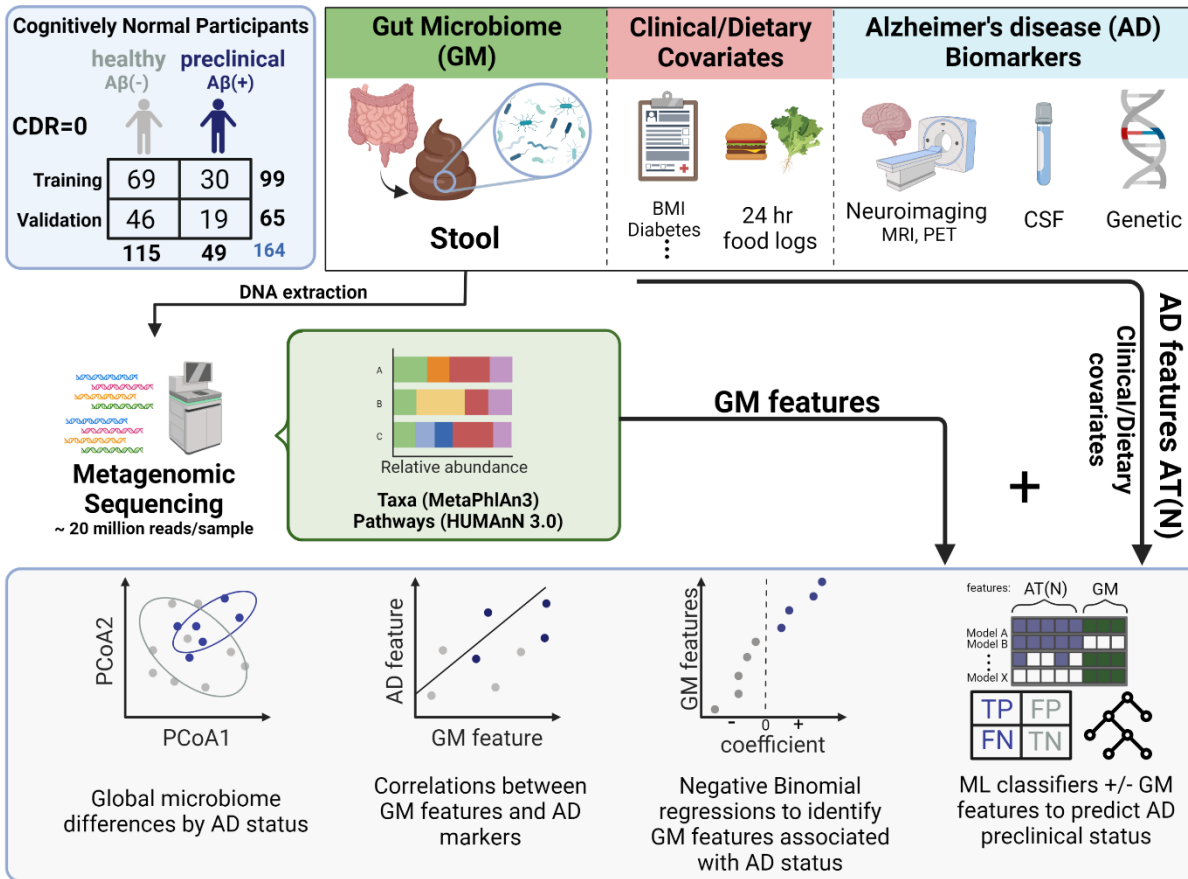

**Fig. S1. Schematic of study design and analyses.** Stool metagenomes, 24-hour diet logs, clinical covariates, as well as neuroimaging (MRI and PET), CSF, and genetic AD biomarkers from 115 healthy (CDR 0, A $\beta$  marker negative) and 49 preclinical AD (CDR 0, A $\beta$  marker positive) participants were included in this cross-sectional study. For machine learning analyses (Figs 4, S6), participants were randomly split into training (69 healthy, 30 preclinical) or validation (46 healthy, 19 preclinical) cohorts. GM (gut microbiome), AD (Alzheimer's disease), AT(N) (A $\beta$ , tau, and neurodegeneration), ML (machine learning), PCoA (Principal Coordinates Analysis), A $\beta$  (amyloid beta). Schematic created with BioRender.

A

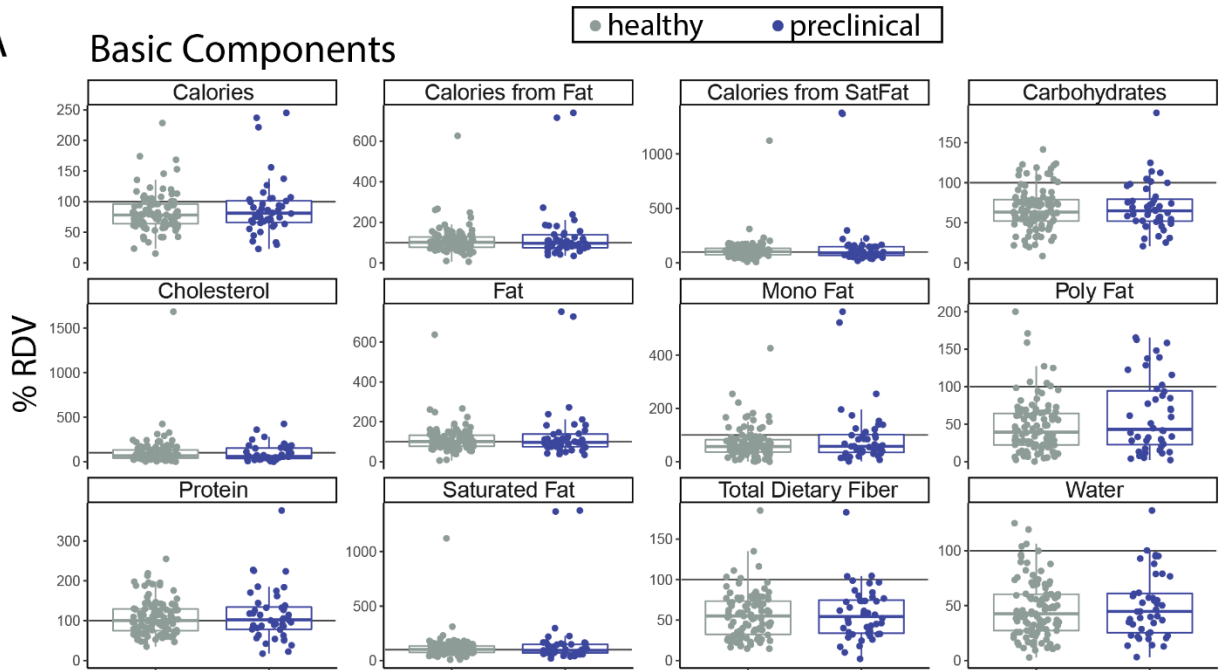

B

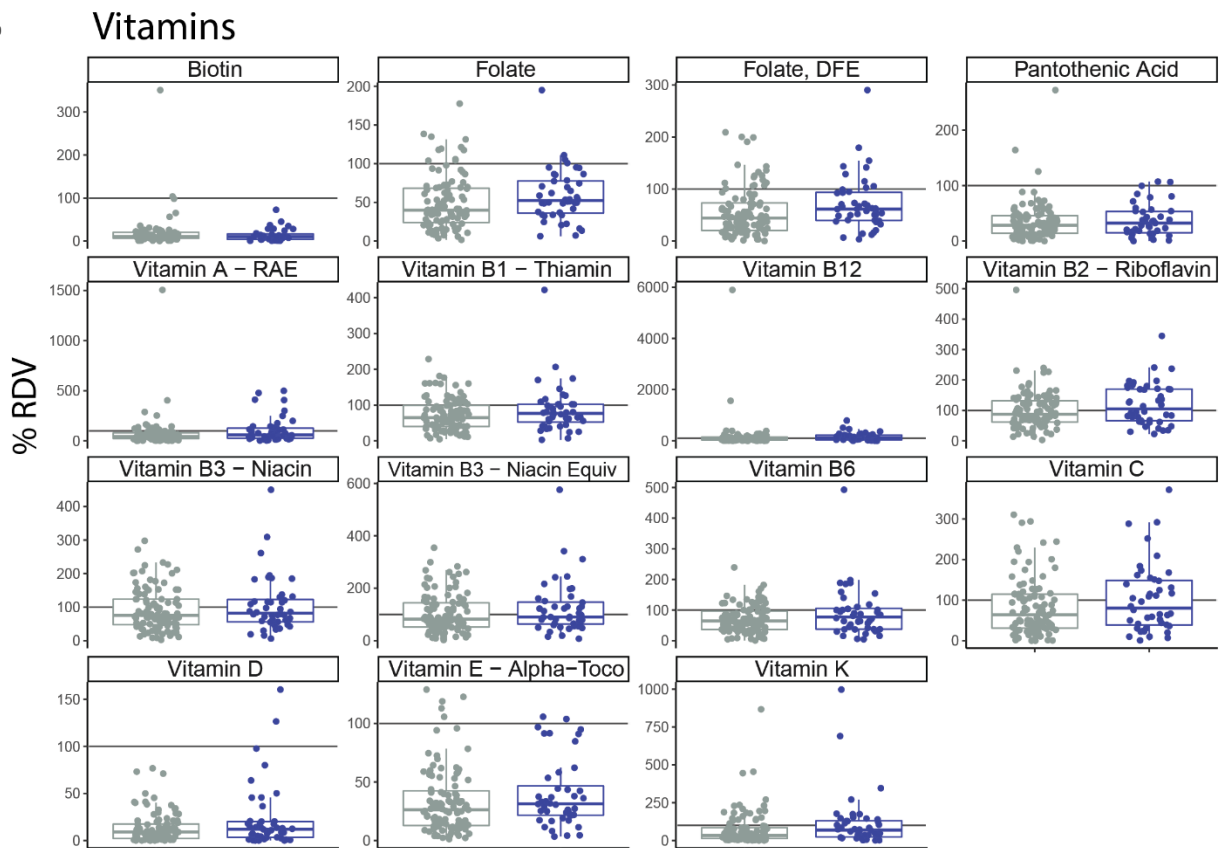

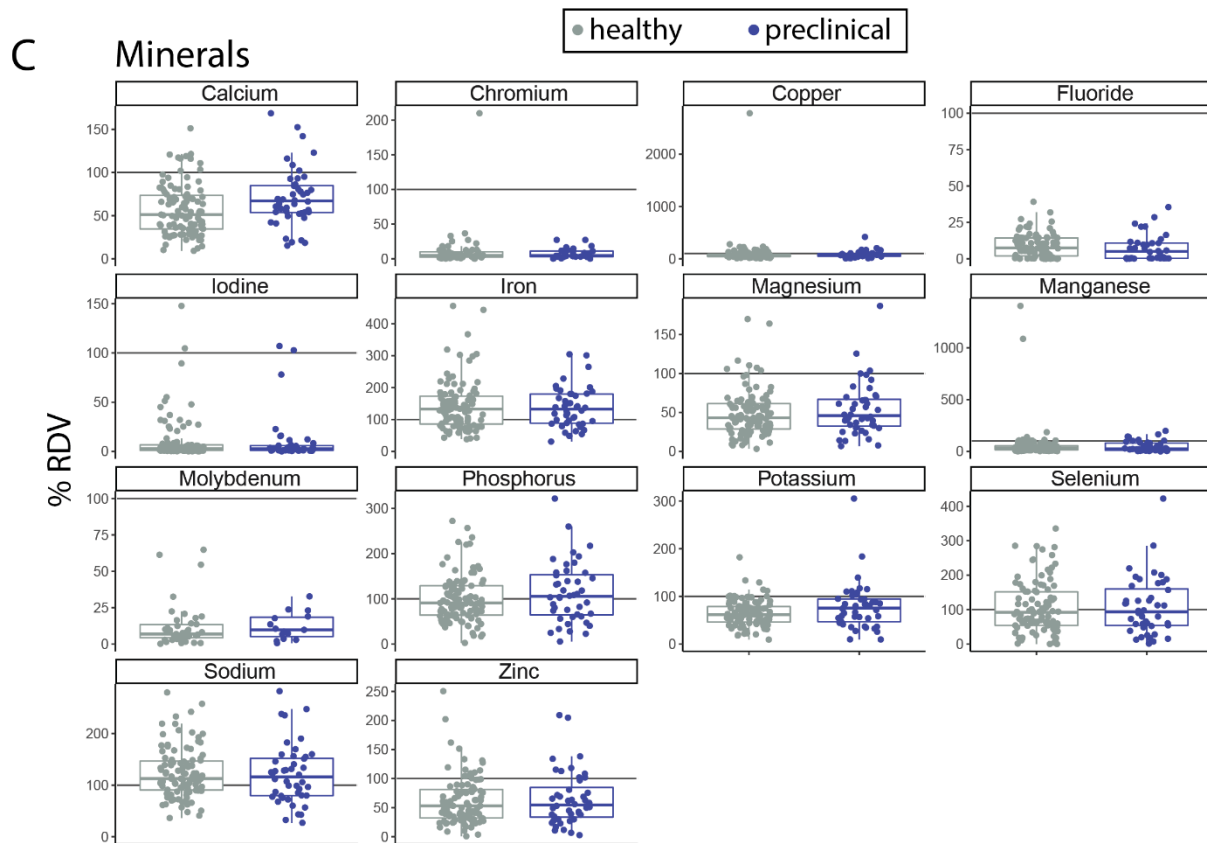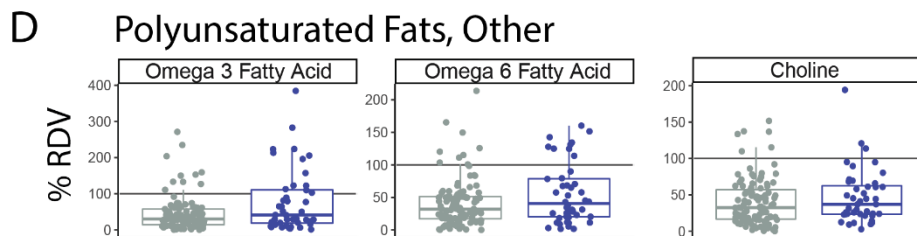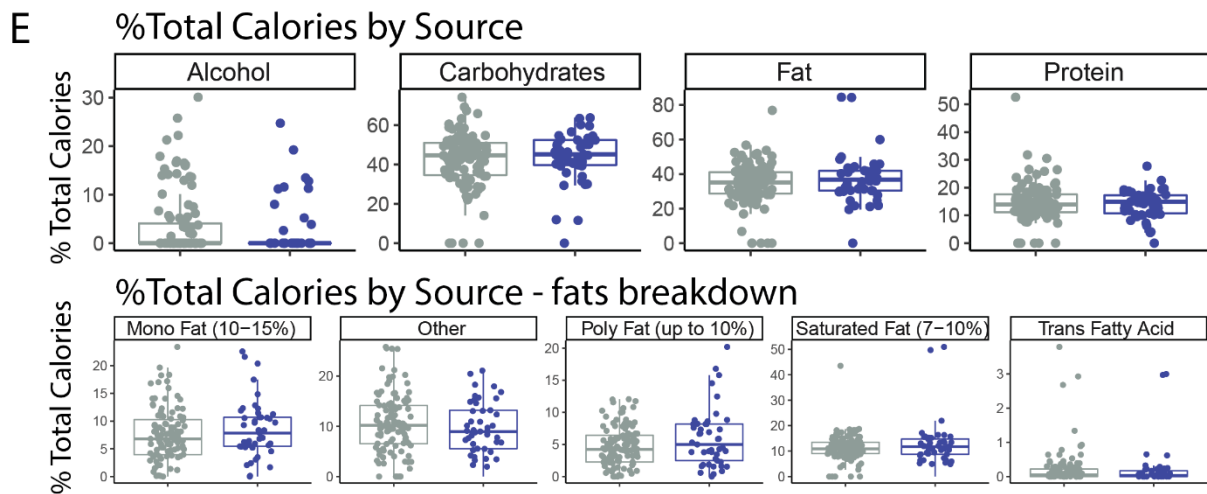

**Fig. S2. Nutritional profiles from stool sample-matched diet logs do not significantly differ between healthy and preclinical AD groups.** Nutritional profiles derived from participant-reported diet logs for the 24 hours preceding stool sample collection are compared between healthy and preclinical AD participants. Percent recommended daily value (% RDV) intakes for healthy and preclinical AD individuals for **(A)** basic dietary components, **(B)** vitamins, **(C)** minerals, and **(D)** polyunsaturated (poly) fat and other nutrient categories. Horizontal gray lines indicate 100% of the RDV for each nutrient. **(E)** Percent of total calories sourced from each major nutrient group over the 24-hour period for healthy and preclinical AD individuals. No significant differences were observed for any nutrient category (Student's t-tests, Benjamini-Hochberg adjusted). Nutritional profiles were generated from food logs by a registered and licensed dietitian using the ESHA Food Processor® Nutritional Analysis software.

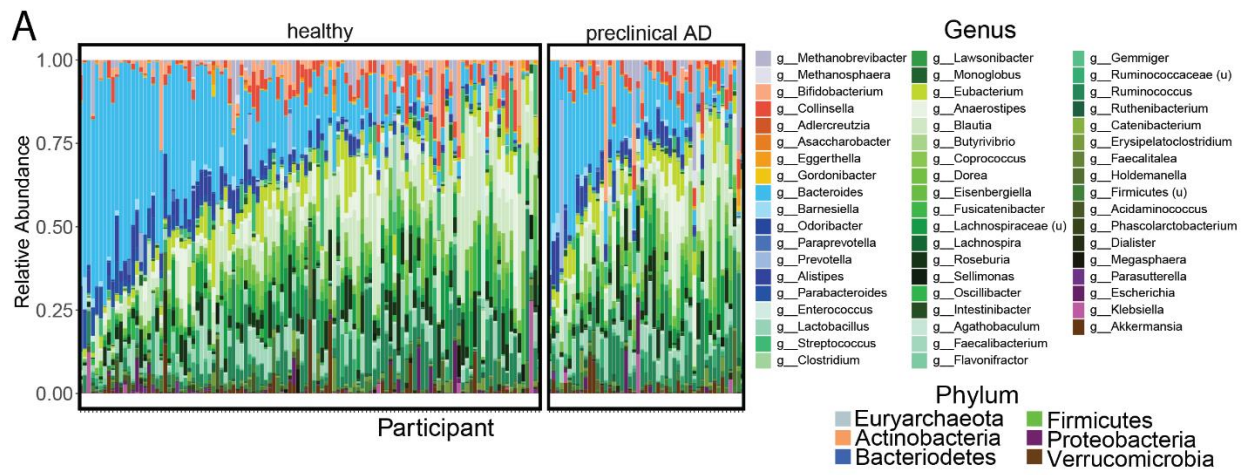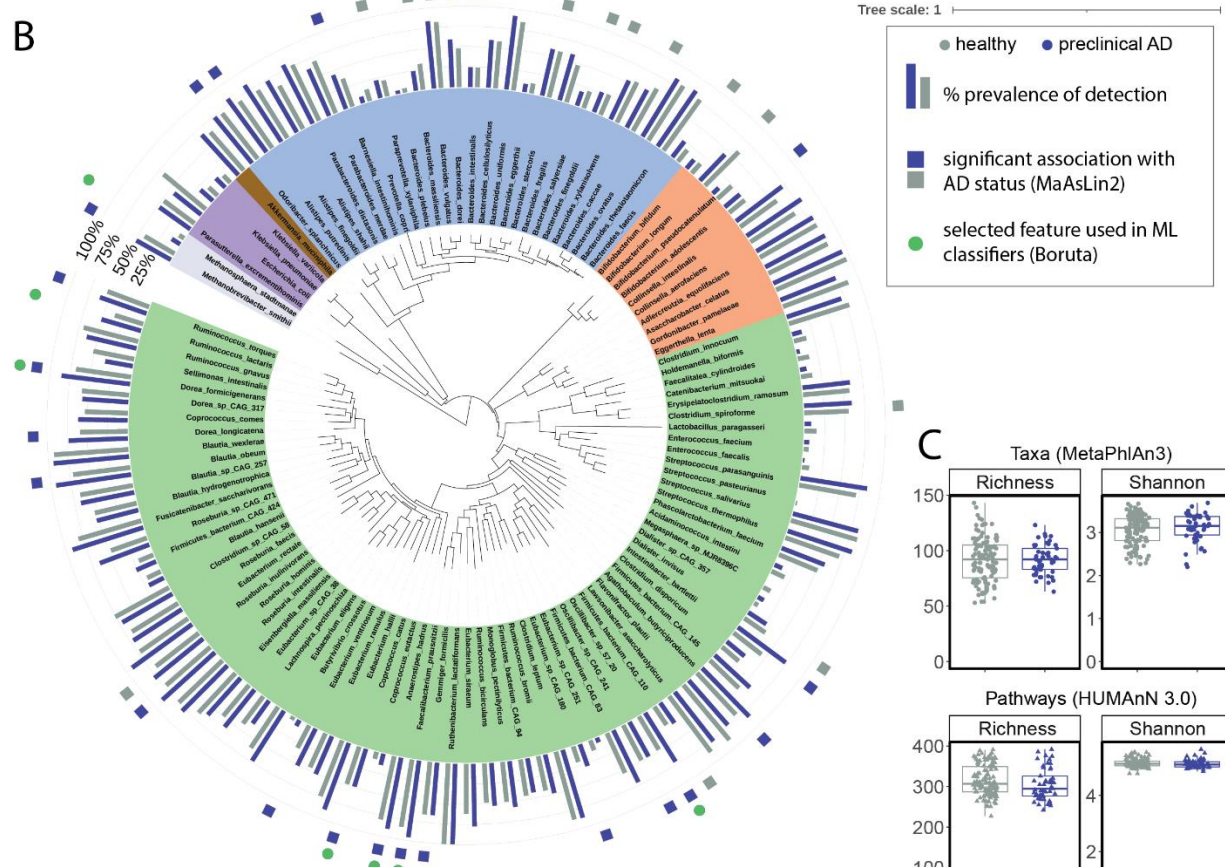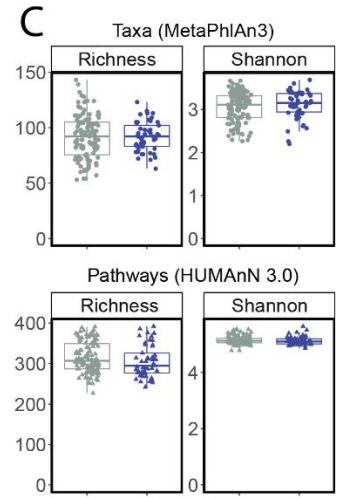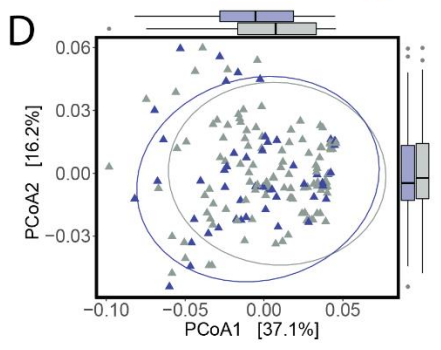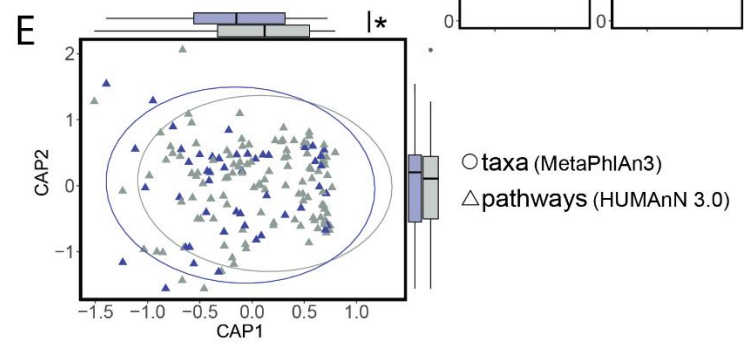

**Fig. S3. Gut microbiome characteristics of the study cohort.** **A)** Stacked taxonomic (MetaPhlan3) bar plots at the genus level by participant, with color grouping at the phylum level (inset legend). Participants ordered by increasing Firmicutes/Bacteroidetes relative abundance ratio. Lowly abundant taxa exhibiting mean relative abundance  $\leq 0.1\%$  across all samples are omitted. 'u': unclassified. **B)** Phylogenetic tree of observed taxa in (A). Taxa labels colored by phylum (see inset legend for panel A). % prevalence: percentage of samples in which each taxon was detected, stratified by AD status. Top taxa significantly associated with preclinical AD or healthy status in negative binomial regression models (MaAsLin2,  $\text{abs}(\text{coefficient}) > 0.15$  and prevalence  $> 15\%$ ) are indicated, as are the taxa selected as training features for Random Forest classifiers (Boruta). Tree visualized using iTOL. **C)** Alpha diversity (richness, or number of unique observed taxa, and Shannon Diversity Index) for MetaPhlan3 taxa, and HUMAnN 3.0 functional pathways. Alpha diversities are not significantly different by preclinical AD status. **D)** PCoA of between-sample binary Bray-Curtis dissimilarities calculated from HUMAnN 3.0 pathway profiles. After accounting for clinical covariates, functional pathway composition is not significantly associated with preclinical AD status (PERMANOVA model summary in Table S4). **E)** Corresponding CAP (canonical analysis of principal coordinates) ordination on binary Bray-Curtis distances calculated from HUMAnN 3.0 pathway profiles, using the same terms as the PERMANOVA in (D). Functional pathway composition is again not significantly associated with preclinical AD status (Table S5). Sample coordinates along the CAP1 axis significantly differ by AD status ( $P = 0.036$ , Student's t-test). Ellipses represent 95% confidence bounds around group centroids. \* $P < 0.05$ . Related to Figs. 1, 3, and 4.

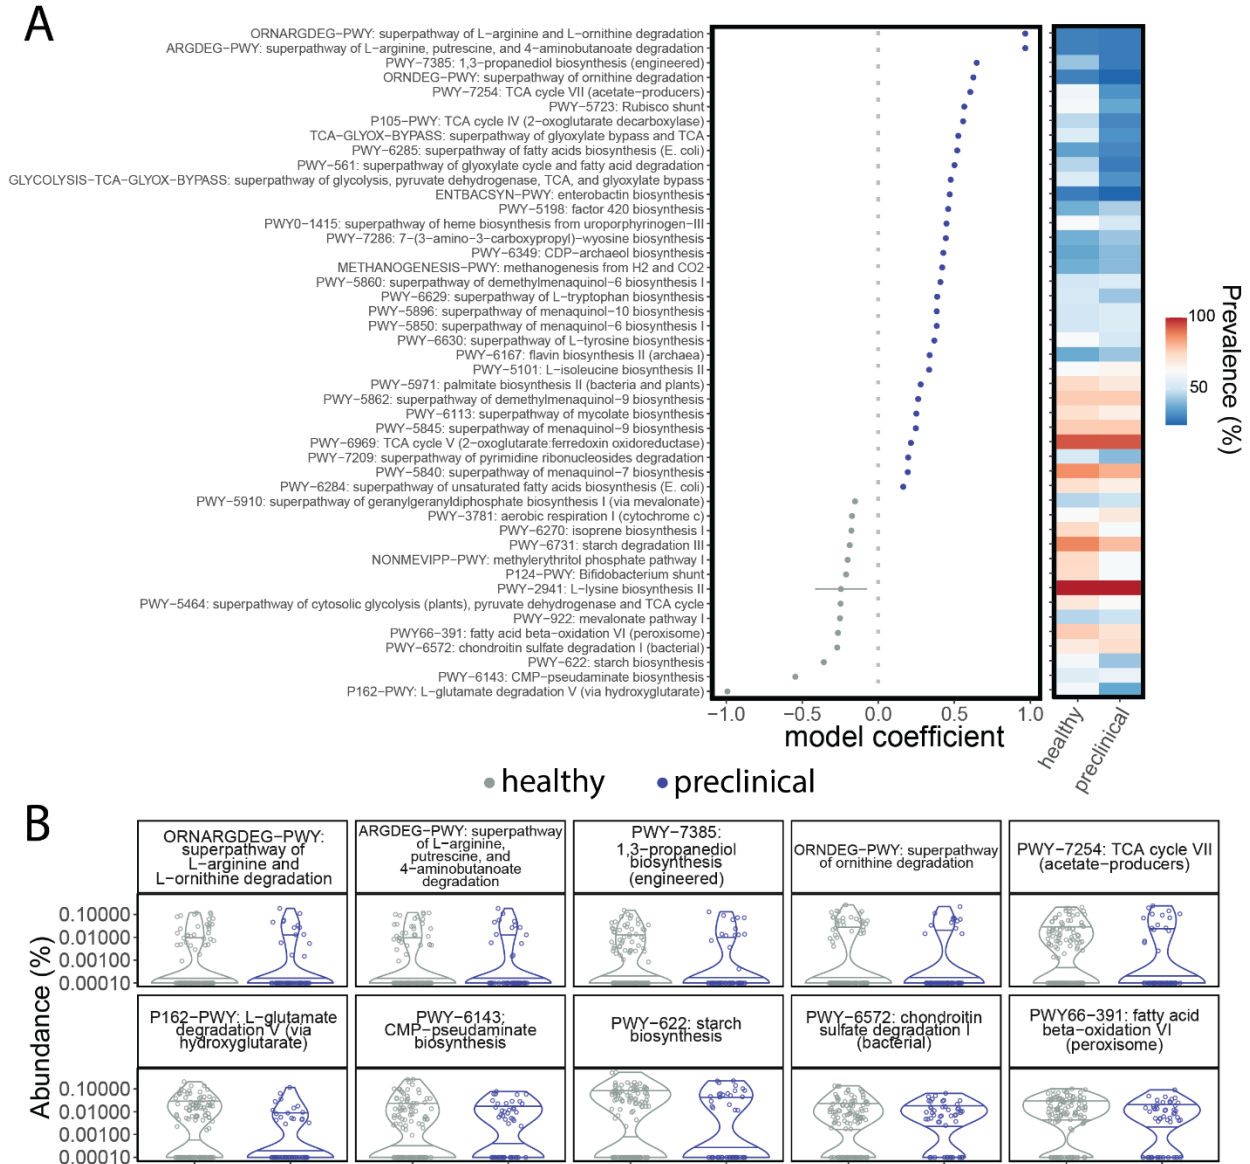

**Fig. S4. Fitting negative binomial models to gut microbiome functional pathway data identifies pathways significantly associated with AD preclinical status.** A) Model coefficients (left panel) and prevalence (right panel) of top-ranking pathways significantly associated with healthy or preclinical AD status. Shown are pathways detected in at least 15% of samples, with Benjamini-Hochberg adjusted p-values of the coefficient  $< 0.05$ , and with magnitude of the coefficient  $> 0.15$ . Error bars represent the standard error of the coefficient, and may not be visible. Taxa coefficients are from negative binomial regression models (as implemented in MaAslin2)



that additionally include participant age, *APOE*  $\epsilon$ 4 carrier status, diabetes, body mass index (BMI), hypertension, and time elapsed between PET or lumbar puncture for A $\beta$  quantification and stool collection as predictors. **B)** Relative abundances of the 10 pathways most associated with preclinical AD (top row) or healthy status (bottom row), by their model coefficient. Functional pathway profiles inferred from metagenomic sequence data using HUMAnN3.0. All regression model results available in Supplementary Data File 2. Related to Fig. 3.

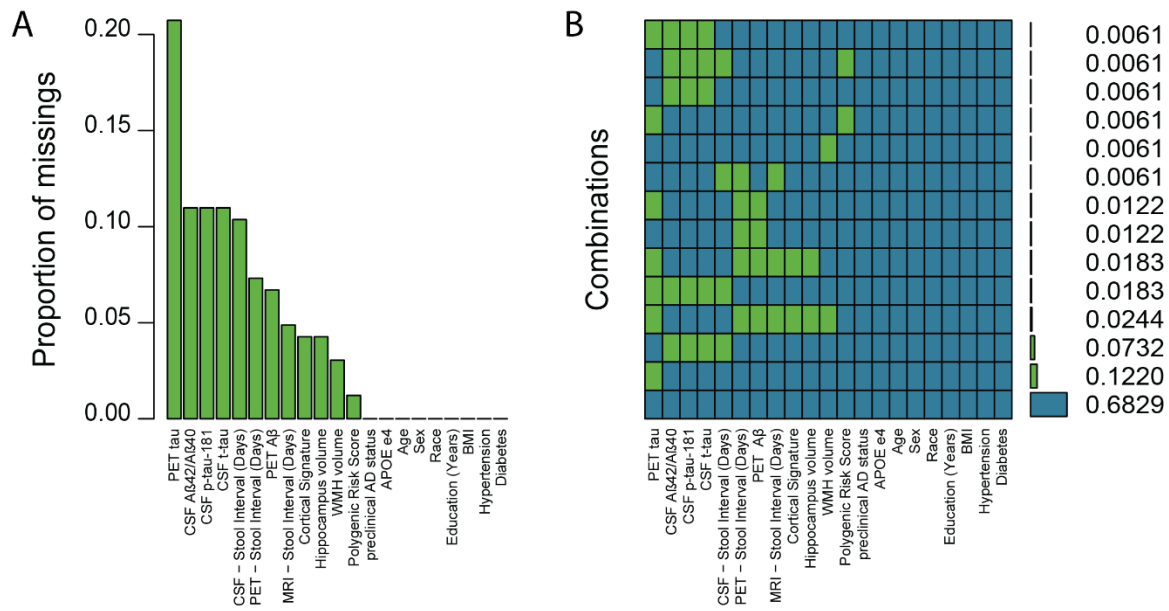

**Fig. S5. Summary of missing data imputed for RF analyses.** **A)** Proportion of participants with missing data for each feature (biomarker or clinical covariates). **B)** Proportion of missing combinations of features. Related to Fig. 4, S6.

**A**

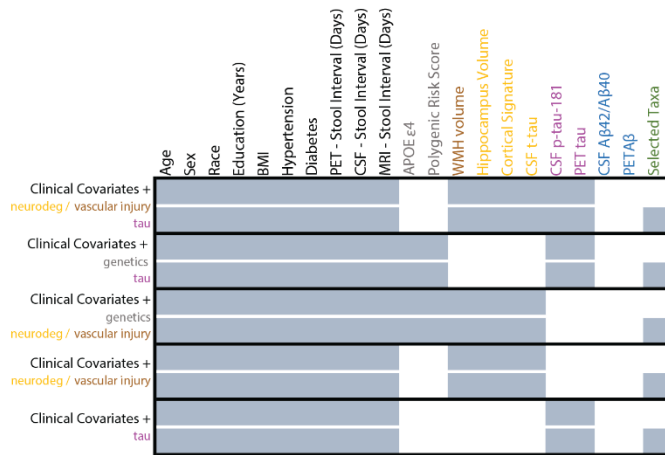

**C**

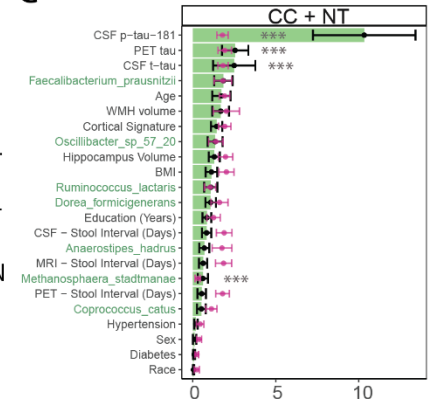

**B**

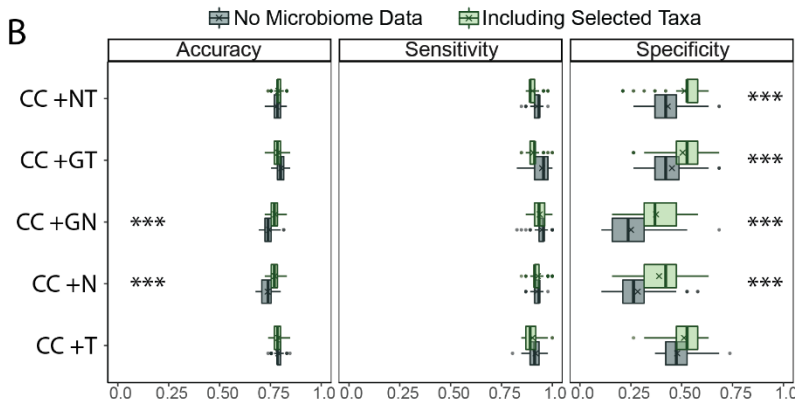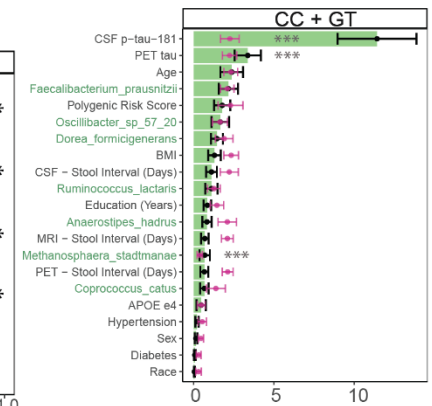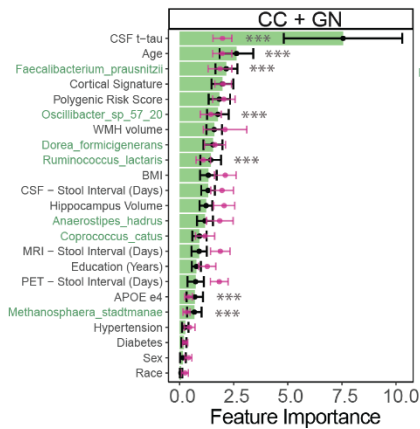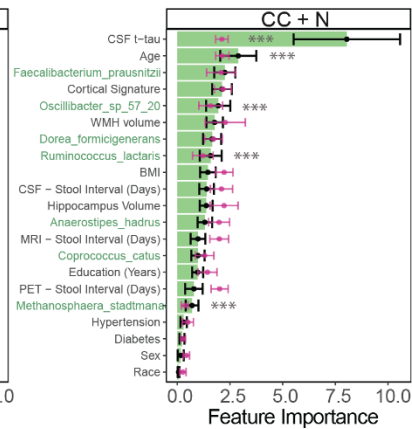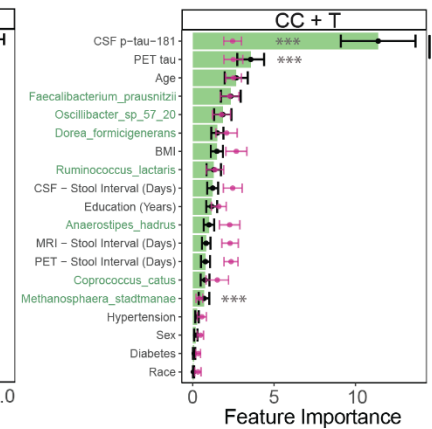

**D**

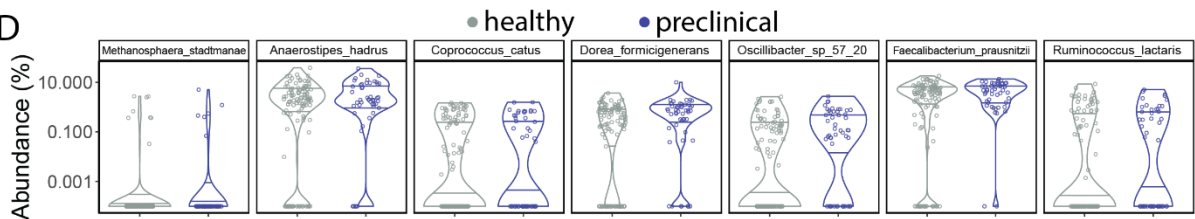

**Fig. S6. Gut microbiome features improve accuracy and specificity, but not sensitivity, of Random Forest (RF) classifiers for AD status that include tau and neurodegeneration biomarkers.** **A)** Summary of features included in each of the RF models reported in (B-C). Feature inclusion is denoted by shaded cells. Compared are models that include or exclude feature-selected gut taxa (bottom and top of each model panel). Feature labels are colored by data/biomarker type (green: gut taxa; blue: amyloid; purple: tau; orange: neurodegeneration; brown: vascular injury; grey: genetic risk factors; black: clinical covariates). All models exclude amyloid biomarkers (PET A $\beta$  and CSF A $\beta$ 42/A $\beta$ 40). Model shorthand names listed in the right margin. CC: clinical covariates; T: tau; N: neurodegeneration. **B)** Performance metrics for Random Forest models that include or exclude feature-selected gut microbiome taxa (grey: no microbiome features; green: including relative abundances of feature-selected taxa). Box plots summarize performance metrics on the retained validation cohort of models trained on 100 random partitions of the training cohort. Means are denoted by 'X'. \* $P < 0.05$ , \*\*\* $P < 0.001$ . ANOVAs with Tukey's HSD, Bonferroni adjusted for multiple comparisons at both ANOVA and Tukey honestly significant difference test levels. **C)** Importance of the features included each model, averaged over the 100 training partitions (black), optionally with random class-label shuffling at each iteration to generate null distributions (pink). Error bars represent standard deviation. The 7 taxonomic features are highlighted in green. \*\*\* $P < 0.001$ , Student's t-tests with Benjamini-Hochberg adjustment. **D)** Relative abundances of the 7 feature-selected taxa. Related to Table S9, and Figs. S5, 4.

**Table S1. Time elapsed between stool collection and most recent neuroimaging assessments (PET or MRI), lumbar puncture for CSF, or Clinical Dementia Rating (CDR) assessments for healthy and preclinical participants.** Bottom row: time elapsed between stool collection and the A $\beta$  marker (from PET or CSF) used to separate participants into preclinical AD and healthy groups. P: Student's t-tests comparing healthy and preclinical groups.

|                                                  | Healthy mean years (sd) | Preclinical mean years (sd) | P     | max (years) | min (days) |
|--------------------------------------------------|-------------------------|-----------------------------|-------|-------------|------------|
| <b>PET</b>                                       | 2.38 (1.41)             | 2.30 (1.35)                 | 0.733 | 7.84        | 3          |
| <b>CSF</b>                                       | 2.58 (1.92)             | 3.31 (3.38)                 | 0.095 | 16.6        | 24         |
| <b>MRI</b>                                       | 2.28 (1.47)             | 2.26 (1.35)                 | 0.934 | 8.29        | 3          |
| <b>CDR</b>                                       | 0.31 (0.18)             | 0.34 (0.47)                 | 0.522 | 3.34        | 0          |
| <b>Amyloid positivity biomarker (PET or CSF)</b> | 2.40 (1.43)             | 2.35 (1.39)                 | 0.819 | 10.6        | 3          |

**Table S2. Permutational analysis of variance (PERMANOVA) test on MetaPhlAn3 taxonomic relative abundances using between-sample UniFrac distances.** Terms added sequentially (first to last). Number of permutations: 10,000. Related to Fig 1B.

|                         | Df  | SumOfSqs | R2    | F     | P            |
|-------------------------|-----|----------|-------|-------|--------------|
| <b>Age</b>              | 1   | 0.201    | 0.013 | 2.133 | <b>0.016</b> |
| <b>APOE4</b>            | 1   | 0.074    | 0.005 | 0.790 | 0.669        |
| <b>Diabetes</b>         | 1   | 0.206    | 0.013 | 2.196 | <b>0.015</b> |
| <b>BMI</b>              | 1   | 0.151    | 0.010 | 1.602 | <b>0.080</b> |
| <b>Hypertension</b>     | 1   | 0.037    | 0.002 | 0.391 | 0.986        |
| <b>Interval_Days</b>    | 1   | 0.088    | 0.006 | 0.932 | 0.491        |
| <b>amyloid.positive</b> | 1   | 0.174    | 0.011 | 1.847 | <b>0.036</b> |
| <b>Residual</b>         | 156 | 14.670   | 0.940 | NA    | NA           |
| <b>Total</b>            | 163 | 15.599   | 1     | NA    | NA           |

**Table S3. Canonical analysis of principal coordinates (CAP) on the PCoA ordination of MetaPhlAn3 taxonomic relative abundances using between-sample UniFrac distances (Table S2). Terms added sequentially (first to last). Number of permutations: 10,000. Related to Fig 1C.**

|                         | <b>Df</b> | <b>SumOfSqs</b> | <b>F</b> | <b>P</b>     |
|-------------------------|-----------|-----------------|----------|--------------|
| <b>Age</b>              | 1         | 0.217           | 1.911    | <b>0.018</b> |
| <b>APOE4</b>            | 1         | 0.095           | 0.837    | 0.654        |
| <b>Diabetes</b>         | 1         | 0.225           | 1.975    | <b>0.016</b> |
| <b>BMI</b>              | 1         | 0.168           | 1.479    | <b>0.073</b> |
| <b>Hypertension</b>     | 1         | 0.058           | 0.505    | 0.989        |
| <b>Interval_Days</b>    | 1         | 0.108           | 0.945    | 0.497        |
| <b>amyloid.positive</b> | 1         | 0.191           | 1.682    | <b>0.040</b> |
| <b>Residual</b>         | 156       | 17.757          | NA       | NA           |

**Table S4. Permutational analysis of variance (PERMANOVA) test on HUMAN 3.0 functional pathway relative abundances using between-sample binary Bray-Curtis distances. Terms added sequentially (first to last). Number of permutations: 10,000. Related to Fig S3D.**

|                         | <b>Df</b> | <b>SumOfSqs</b> | <b>R2</b> | <b>F</b> | <b>P</b>     |
|-------------------------|-----------|-----------------|-----------|----------|--------------|
| <b>Age</b>              | 1         | 0.002           | 0.005     | 0.816    | 0.540        |
| <b>APOE4</b>            | 1         | 0.008           | 0.018     | 2.984    | <b>0.014</b> |
| <b>Diabetes</b>         | 1         | 0.020           | 0.042     | 7.189    | <b>0.000</b> |
| <b>BMI</b>              | 1         | 0.003           | 0.007     | 1.198    | 0.300        |
| <b>Hypertension</b>     | 1         | 0.000           | 0.000     | -0.025   | 0.998        |
| <b>Interval_Days</b>    | 1         | 0.002           | 0.004     | 0.672    | 0.655        |
| <b>amyloid.positive</b> | 1         | 0.003           | 0.007     | 1.169    | 0.298        |
| <b>Residual</b>         | 156       | 0.442           | 0.918     | NA       | NA           |
| <b>Total</b>            | 163       | 0.481           | 1.000     | NA       | NA           |

**Table S5. Canonical analysis of principal coordinates (CAP) on the PCoA ordination of HUMAnN 3.0 functional pathway relative abundances using between-sample binary Bray-Curtis distances (Table S4). Terms added sequentially (first to last). Number of permutations: 10,000. Related to Fig S3E.**

|                         | <b>Df</b> | <b>SumOfSqs</b> | <b>F</b> | <b>P</b>     |
|-------------------------|-----------|-----------------|----------|--------------|
| <b>Age</b>              | 1         | 0.004           | 0.868    | 0.537        |
| <b>APOE4</b>            | 1         | 0.009           | 2.281    | <b>0.018</b> |
| <b>Diabetes</b>         | 1         | 0.022           | 5.204    | <b>0.000</b> |
| <b>BMI</b>              | 1         | 0.005           | 1.175    | 0.262        |
| <b>Hypertension</b>     | 1         | 0.002           | 0.432    | 0.983        |
| <b>Interval_Days</b>    | 1         | 0.003           | 0.803    | 0.628        |
| <b>amyloid.positive</b> | 1         | 0.004           | 1.053    | 0.353        |
| <b>Residual</b>         | 156       | 0.646           | NA       | NA           |

**Table S6. Model summaries and corresponding analyses of variance for linear regressions of PET A $\beta$  (Centiloid), PET tau (Tauopathy), or Cortical Signature on Axis 1 from the PCoA ordination of MetaPhlAn3 taxonomic abundances (Tax.PCoA1). Dependent variables are regressed on preclinical status ('amyloid.positive'), PCoA1, and their interaction. Reported are the coefficient estimates (s.e.) and [95% CIs]. + p < 0.1, \* p < 0.05, \*\* p < 0.01, \*\*\* p < 0.001. ANOVAs against null models with preclinical status as the only predictor. Related to Fig 2B, top row panels.**

|                                                                 | <b>Model 1: Centiloid~</b>            | <b>Model 2: Tauopathy~</b>                 | <b>Model 3: Cortical Signature~</b>       |
|-----------------------------------------------------------------|---------------------------------------|--------------------------------------------|-------------------------------------------|
| <b>(Intercept)</b>                                              | 4.721 (1.895)*<br>[0.977, 8.465]      | 1.172 (0.018)***<br>[1.137, 1.207]         | 2.552 (0.011)***<br>[2.530, 2.573]        |
| <b>Tax.PCoA1</b>                                                | -2.273 (12.307)<br>[-26.591, 22.046]  | 0.014 (0.117)<br>[-0.217, 0.245]           | 0.137 (0.071)+<br>[-0.004, 0.277]         |
| <b>amyloid.positive1</b>                                        | 50.975 (3.447)***<br>[44.163, 57.786] | 0.162 (0.033)***<br>[0.096, 0.227]         | -0.033 (0.020)<br>[-0.072, 0.007]         |
| <b>Tax.PCoA1 <math>\times</math> amyloid.positive1</b>          | -6.143 (24.678)<br>[-54.907, 42.621]  | <b>-0.478 (0.236)*</b><br>[-0.944, -0.012] | <b>-0.255 (0.144)+</b><br>[-0.538, 0.029] |
| <b>Num.Obs.</b>                                                 | 153                                   | 130                                        | 157                                       |
| <b>R2</b>                                                       | 0.606                                 | 0.171                                      | 0.048                                     |
| <b>R2 Adj.</b>                                                  | 0.598                                 | 0.152                                      | 0.029                                     |
| <b>AIC</b>                                                      | 1344.1                                | -90.2                                      | -236.0                                    |
| <b>BIC</b>                                                      | 1359.3                                | -75.9                                      | -220.7                                    |
| <b>Log.Lik.</b>                                                 | -667.069                              | 50.117                                     | 123.006                                   |
| <b>ANOVA against null model: (biomarker ~ amyloid.positive)</b> |                                       |                                            |                                           |
| <b>Residual DF</b>                                              | 149                                   | 126                                        | 153                                       |
| <b>RSS</b>                                                      | 54853                                 | 3.521                                      | 1.918                                     |
| <b>DF</b>                                                       | 2                                     | 2                                          | 2                                         |
| <b>Sum of Sq.</b>                                               | 69.537                                | 0.144                                      | 0.058                                     |
| <b>F</b>                                                        | 0.094                                 | 2.577                                      | 2.296                                     |
| <b>P</b>                                                        | 0.910                                 | <b>0.080</b>                               | 0.104                                     |



**Table S7. Model summaries and corresponding analyses of variance for linear regressions of PET A $\beta$  (Centiloid), PET tau (Tauopathy), or Cortical Signature on Axis 2 from the PCoA ordination of MetaPhlAn3 taxonomic abundances (Tax.PCoA2). Dependent variables are regressed on preclinical status ('amyloid.positive'), PCoA2, and their interaction. Reported are the coefficient estimates (s.e.) and [95% CIs]. + p < 0.1, \* p < 0.05, \*\* p < 0.01, \*\*\* p < 0.001. ANOVAs against null models with preclinical status as the only predictor. Related to Fig 2B, middle row panels.**

|                                                                 | <b>Model 1: Centiloid~</b>                  | <b>Model 2: Tauopathy~</b>               | <b>Model 3: Cortical Signature~</b> |
|-----------------------------------------------------------------|---------------------------------------------|------------------------------------------|-------------------------------------|
| <b>(Intercept)</b>                                              | 4.674 (1.850)*<br>[1.019, 8.329]            | 1.174 (0.017)***<br>[1.139, 1.208]       | 2.548 (0.011)***<br>[2.527, 2.570]  |
| <b>Tax.PCoA2</b>                                                | -11.660 (19.190)<br>[-49.581, 26.260]       | 0.165 (0.185)<br>[-0.201, 0.530]         | -0.112 (0.114)<br>[-0.337, 0.113]   |
| <b>amyloid.positive1</b>                                        | 49.669 (3.328)***<br>[43.094, 56.245]       | 0.135 (0.032)***<br>[0.070, 0.199]       | -0.033 (0.020)<br>[-0.072, 0.007]   |
| <b>Tax.PCoA2 <math>\times</math> amyloid.positive1</b>          | <b>74.039 (34.441)*</b><br>[5.983, 142.095] | <b>0.610 (0.338)+</b><br>[-0.058, 1.279] | 0.074 (0.206)<br>[-0.333, 0.481]    |
| <b>Num.Obs.</b>                                                 | 153                                         | 130                                      | 157                                 |
| <b>R2</b>                                                       | 0.619                                       | 0.191                                    | 0.026                               |
| <b>R2 Adj.</b>                                                  | 0.611                                       | 0.172                                    | 0.007                               |
| <b>AIC</b>                                                      | 1339.2                                      | -93.3                                    | -232.4                              |
| <b>BIC</b>                                                      | 1354.3                                      | -79.0                                    | -217.1                              |
| <b>Log.Lik.</b>                                                 | -664.578                                    | 51.661                                   | 121.206                             |
| <b>ANOVA against null model: (biomarker ~ amyloid.positive)</b> |                                             |                                          |                                     |
| <b>Residual DF</b>                                              | 149                                         | 126                                      | 153                                 |
| <b>RSS</b>                                                      | 53096                                       | 3.438                                    | 1.951                               |
| <b>DF</b>                                                       | 2                                           | 2                                        | 2                                   |
| <b>Sum of Sq.</b>                                               | 1826.8                                      | 0.227                                    | 0.025                               |
| <b>F</b>                                                        | 2.563                                       | 4.153                                    | 0.962                               |
| <b>P</b>                                                        | <b>0.080</b>                                | <b>0.018</b>                             | 0.385                               |

**Table S8. Model summaries and corresponding analyses of variance for linear regressions of PET A $\beta$  (Centiloid), PET tau (Tauopathy), or Cortical Signature on Axis 1 from the PCoA ordination of HUMAnN 3.0 functional pathway abundances (FnL.PCoA1).** Dependent variables are regressed on preclinical status ('amyloid.positive'), PCoA1, and their interaction. Reported are the coefficient estimates (s.e.) and [95% CIs]. + p < 0.1, \* p < 0.05, \*\* p < 0.01, \*\*\* p < 0.001. ANOVAs against null models with preclinical status as the only predictor. Related to Fig 2B, bottom row panels.

|                                                                 | <b>Model 1: Centiloid~</b>                      | <b>Model 2: Tauopathy~</b>         | <b>Model 3: Cortical Signature~</b> |
|-----------------------------------------------------------------|-------------------------------------------------|------------------------------------|-------------------------------------|
| <b>(Intercept)</b>                                              | 4.763 (1.851)*<br>[1.105, 8.420]                | 1.173 (0.018)***<br>[1.138, 1.208] | 2.550 (0.011)***<br>[2.528, 2.571]  |
| <b>FnL.PCoA1</b>                                                | 3.104 (59.049)<br>[-113.578, 119.785]           | -0.333 (0.552)<br>[-1.424, 0.759]  | -0.227 (0.336)<br>[-0.890, 0.437]   |
| <b>amyloid.positive1</b>                                        | 48.976 (3.355)***<br>[42.347, 55.606]           | 0.138 (0.033)***<br>[0.073, 0.204] | -0.032 (0.020)<br>[-0.072, 0.008]   |
| <b>FnL.PCoA1 <math>\times</math> amyloid.positive1</b>          | <b>-200.293 (99.685)*</b><br>[-397.272, -3.315] | -1.125 (0.944)<br>[-2.993, 0.743]  | 0.600 (0.588)<br>[-0.562, 1.763]    |
| <b>Num.Obs.</b>                                                 | 153                                             | 130                                | 157                                 |
| <b>R2</b>                                                       | 0.621                                           | 0.164                              | 0.026                               |
| <b>R2 Adj.</b>                                                  | 0.613                                           | 0.144                              | 0.007                               |
| <b>AIC</b>                                                      | 1338.3                                          | -89.1                              | -232.4                              |
| <b>BIC</b>                                                      | 1353.4                                          | -74.7                              | -217.2                              |
| <b>Log.Lik.</b>                                                 | -664.131                                        | 49.535                             | 121.222                             |
| <b>ANOVA against null model: (biomarker ~ amyloid.positive)</b> |                                                 |                                    |                                     |
| <b>Residual DF</b>                                              | 149                                             | 126                                | 153                                 |
| <b>RSS</b>                                                      | 52786                                           | 3.552                              | 1.962                               |
| <b>DF</b>                                                       | 2                                               | 2                                  | 2                                   |
| <b>Sum of Sq.</b>                                               | 2136.6                                          | 0.112                              | 0.014                               |
| <b>F</b>                                                        | 3.015                                           | 1.992                              | 0.526                               |
| <b>P</b>                                                        | <b>0.052</b>                                    | 0.141                              | 0.592                               |

**Table S9. Summary of statistically significant changes in performance of Random Forest classifiers (Fig. S6) after incorporating gut microbiome features.** Mean accuracy, sensitivity, and specificity for RF models trained on subsets of AD biomarkers, with or without gut microbiome features (selected MetaPhlAn3 taxa). Each model was trained on 100 random subsets of the training cohort; shown are the mean performance metrics of those 100 models on the validation cohort. Models are included if they offered significant improvement in at least one performance metric with inclusion of taxonomic features, by ANOVA p-value after Bonferroni adjustment across all ANOVAs (groups: No Microbiome Data, Including Selected Taxa [MetaPhlAn3]). Reported are the corresponding differences of means and 95% CIs. P-values: Tukey’s honestly significant difference test after ANOVA for each model, additionally adjusted using the Bonferroni method. Related to Fig. S6. See also Table 2.

| Model                                              | Metric      | No Microbiome Data |       | Including Selected Taxa |       | Including Selected Taxa - No Microbiome Data |            |            |          |
|----------------------------------------------------|-------------|--------------------|-------|-------------------------|-------|----------------------------------------------|------------|------------|----------|
|                                                    |             | Mean               | SD    | Mean                    | SD    | Difference                                   | CI95 lower | CI95 upper | P        |
| Clinical Covariates + neurodeg/vascular + tau      | Specificity | 0.432              | 0.090 | 0.514                   | 0.102 | 0.082                                        | 0.055      | 0.109      | 1.05E-07 |
| Clinical Covariates + genetics + tau               | Specificity | 0.452              | 0.091 | 0.505                   | 0.090 | 0.053                                        | 0.027      | 0.078      | 8.37E-04 |
| Clinical Covariates + genetics + neurodeg/vascular | Accuracy    | 0.744              | 0.026 | 0.773                   | 0.021 | 0.030                                        | 0.023      | 0.036      | 8.60E-13 |
|                                                    | Specificity | 0.251              | 0.108 | 0.374                   | 0.107 | 0.124                                        | 0.094      | 0.154      | 1.41E-12 |
| Clinical Covariates + neurodeg/vascular            | Accuracy    | 0.736              | 0.030 | 0.771                   | 0.021 | 0.035                                        | 0.028      | 0.042      | 8.36E-13 |
|                                                    | Specificity | 0.284              | 0.106 | 0.389                   | 0.100 | 0.105                                        | 0.077      | 0.134      | 1.53E-10 |

**Data File S1.** Participant metadata (demographics, clinical covariates, and neuroimaging, biofluid, and genetic biomarkers).

**Data File S2.** MaAsLin2 significant results for taxa and pathways.

**Data File S3.** Predictive results and performance metrics of Random Forest classifiers for AD preclinical status.

**Data File S4.** MetaPhlAn3 taxonomic relative abundances, HUMAnN 3.0 pathway relative abundances.
